# Supplementary material for: Surface reactivity of non-hydrolytic silicophosphate xerogels: a simple method to create Brønsted or Lewis acid sites on porous supports
Source: Royal Society of Chemistry journal article supplement (doi:10.1039/c5nj02928g), 2016-01-01
Supplement: c5nj02928g1.pdf [file c5nj02928g1.pdf]

## Supplementary information

### Surface reactivity of non-hydrolytic silicophosphate xerogels: A simple way to Brønsted or Lewis acid sites on porous supports

Ales Styskalik,<sup>a,b</sup> David Skoda,<sup>a,b</sup> Zdenek Moravec,<sup>a</sup> Craig E. Barnes,<sup>c</sup> and Jiri Pinkas<sup>\*,a,b</sup>

<sup>a</sup> Masaryk University, Department of Chemistry, Kotlarska 2, CZ-61137 Brno, Czech Republic.

E-mail: [jpinkas@chemi.muni.cz](mailto:jpinkas@chemi.muni.cz)

<sup>b</sup> Masaryk University, CEITEC MU, Kamenice 5, CZ-62500 Brno, Czech Republic.

<sup>c</sup> University of Tennessee, Department of Chemistry, Knoxville, TN 37996-1600, United States.

\*Corresponding author. Phone: +420549496493; fax: +420549492443; E-mail address:

[jpinkas@chemi.muni.cz](mailto:jpinkas@chemi.muni.cz) (J. Pinkas)

## Experimental

### Synthesis of parent xerogels

**SiP.** The parent silicophosphate xerogel was prepared under conditions optimized to give the maximum surface area.<sup>1</sup> In a typical reaction, OP(OSiMe<sub>3</sub>)<sub>3</sub> (TTP) was added dropwise to a stirred solution of Si(OAc)<sub>4</sub> (molar ratio 4:3) in toluene to obtain a clear colorless gel (eq. 1). The gel was aged at 80 °C for one week and then dried under vacuum for two days providing an opaque xerogel (**SiP**). Characterization and spectral analysis data of **SiP** were same as reported previously.<sup>1</sup>

IR (**SiP**, KBr, cm<sup>-1</sup>)  $\nu$ : 490 w, 651 w ( $\nu$  SiC<sub>3</sub>), 765 w ( $\rho_s$  SiCH<sub>3</sub>), 853 vs ( $\rho_{as}$  SiCH<sub>3</sub>), 1021 vs ( $\rho$  CH<sub>3</sub>), 1050 vs ( $\nu$  Si–O–P), 1111 vs ( $\nu$  P–O–Si), 1230, 1258 vs ( $\delta_s$  SiCH<sub>3</sub>) 1300 sh ( $\nu$  P=O), 1374 w ( $\delta_s$  CH<sub>3</sub>), 1420 w ( $\delta_{as}$  CH<sub>3</sub>), 1540 s, 1721 w ( $\nu_{as}$  C=O), 1768 s ( $\nu_{as}$  C=O), 2907 vw ( $\nu_s$  CH<sub>3</sub>), 2964 w ( $\nu_{as}$  CH<sub>3</sub>).

<sup>13</sup>C CPMAS NMR (**SiP**, ppm)  $\delta$ : -1.3 (POSiCH<sub>3</sub>), 16.3 (CH<sub>3</sub>COO bident), 20.4 (CH<sub>3</sub>COO unident), 165.5 (CH<sub>3</sub>COO unident), 190.6 (CH<sub>3</sub>COO bident).

<sup>29</sup>Si CPMAS NMR (**SiP**, ppm)  $\delta$ : 23.6 (POSiMe<sub>3</sub>), -112 (SiO<sub>4</sub>), -162 (SiO<sub>5</sub>), -195 (SiO<sub>6</sub>), -214 (SiO<sub>6</sub>).

<sup>31</sup>P MAS NMR (**SiP**, ppm)  $\delta$ : -45 (P(OSi)<sub>4</sub>).

BET: 568 m<sup>2</sup> g<sup>-1</sup>.

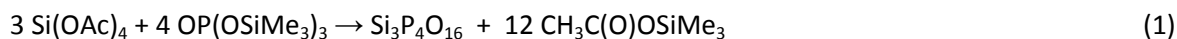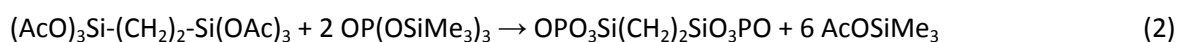

**SiC2SiP**. Similarly, the synthesis of hybrid silicophosphate xerogel was adopted from our previous work.<sup>2</sup> OP(OSiMe<sub>3</sub>)<sub>3</sub> was added dropwise to a stirred solution of (AcO)<sub>3</sub>SiCH<sub>2</sub>CH<sub>2</sub>Si(OAc)<sub>3</sub> in toluene (molar ratio 2:1). After the addition was complete, stirring was stopped and the reaction mixture was kept at 80 °C for one week. The reaction mixture provided a milky rigid gel overnight (eq. 2). The reaction was stopped after one week and dried under vacuum affording opaque xerogel (**SiC2SiP**). Characterization and spectral analysis data of **SiC2SiP** were same as reported previously.<sup>2</sup>

IR (**SiC2SiP**, KBr, cm<sup>-1</sup>)  $\nu$  :  $\nu$  490 m, 608 vw, 639 vw ( $\nu$  SiC<sub>3</sub>), 763 m ( $\rho_s$  SiCH<sub>3</sub>), 790 sh, 851 m ( $\rho_{as}$  SiCH<sub>3</sub>), 1018 vs ( $\nu$  Si–O–P), 1175 m, 1231 w, 1259 m ( $\delta_s$  SiCH<sub>3</sub>), 1313 s ( $\nu$  P=O), 1374 vw ( $\delta_s$  CH<sub>3</sub>), 1406 vw, 1601 vw, 1754 m ( $\nu_{as}$  CH<sub>3</sub>COO unident), 2906 vw ( $\nu_s$  CH<sub>3</sub>), 2963 w ( $\nu_{as}$  CH<sub>3</sub>).

<sup>13</sup>C CPMAS NMR (**SiC2SiP**, ppm)  $\delta$  : 1.2 (POSiCH<sub>3</sub>), 3.7 shoulder (SiCH<sub>2</sub>CH<sub>2</sub>Si), 22.3 (CH<sub>3</sub>COO unident), 170.6 (CH<sub>3</sub>COO unident).

<sup>29</sup>Si MAS NMR (**SiC2SiP**, ppm)  $\delta$  : 26 (POSiMe<sub>3</sub>), –65 (O<sub>3</sub>SiCH<sub>2</sub>CH<sub>2</sub>SiO<sub>3</sub>).

<sup>31</sup>P MAS NMR (**SiC2SiP**, ppm)  $\delta$  : –37 (O=P(OSi)<sub>3</sub>).

BET: 703 m<sup>2</sup> g<sup>-1</sup>.

### Chemical modification of silicophosphate xerogel surfaces.

**Modification with H<sub>2</sub>O**. Characterization and analyses of **SiPH1** xerogel.

IR (**SiPH1**, KBr, cm<sup>-1</sup>)  $\nu$  : 505 m, 610 vw, 686 vw, 762 m ( $\rho_s$  SiCH<sub>3</sub>), 851 vs ( $\rho_{as}$  SiCH<sub>3</sub>), 1077 vs ( $\nu$  Si–O–P), 1095 vs ( $\nu$  P–O–Si), 1259 s ( $\delta_s$  SiCH<sub>3</sub>), 1376 vw ( $\delta_s$  CH<sub>3</sub>), 1419 vw ( $\delta_{as}$  CH<sub>3</sub>), 1548 w ( $\nu_{as}$  COO bident), 1716 w ( $\nu_{as}$  COO unident), 1768 w ( $\nu_{as}$  COO unident), 1656 w ( $\delta$  OH), 2910 vw ( $\nu_s$  CH<sub>3</sub>), 2965 w ( $\nu_{as}$  CH<sub>3</sub>).

<sup>13</sup>C CPMAS NMR (**SiPH1**, ppm)  $\delta$  : –3.9 (POSiCH<sub>3</sub>), 12.5 (CH<sub>3</sub>COO bident), 17.6 (CH<sub>3</sub>COO unident), 163.0 (CH<sub>3</sub>COO unident), 186.7 (CH<sub>3</sub>COO bident).

<sup>29</sup>Si CPMAS NMR (**SiPH1**, ppm)  $\delta$  : 18.3 (POSiMe<sub>3</sub>), –119 (SiO<sub>4</sub>), –201 (SiO<sub>6</sub>), –219 (SiO<sub>6</sub>).

<sup>31</sup>P MAS NMR (**SiPH1**, ppm)  $\delta$  : –49 (P(OSi)<sub>4</sub>), –40 (P(OH)(OSi)<sub>3</sub>).

TG/DSC (air, 5 K min<sup>-1</sup>): weight loss at 1000 °C: 37.7 %.

BET: 279 m<sup>2</sup> g<sup>-1</sup>.

Characterization and analyses of **SiPH3** xerogel.

IR (**SiPH3**, KBr,  $\text{cm}^{-1}$ )  $\nu$  : 495 m, 607 vw, 675 vw, 761 m ( $\rho_s$  SiCH<sub>3</sub>), 853 vs ( $\rho_{as}$  SiCH<sub>3</sub>), 1070 vs ( $\nu$  Si–O–P), 1261 s ( $\delta_s$  SiCH<sub>3</sub>), 1419 w ( $\delta_{as}$  CH<sub>3</sub>), 1669 w ( $\delta$  OH), 2910 vw ( $\nu_s$  CH<sub>3</sub>), 2966 w ( $\nu_{as}$  CH<sub>3</sub>).

TG/DSC (air, 5 K  $\text{min}^{-1}$ ): weight loss at 1000 °C: 46.4 %.

BET: nonporous

Characterization and analyses of **SiC2SiPH1** xerogel.

IR (**SiC2SiPH1**, KBr,  $\text{cm}^{-1}$ )  $\nu$  : 496 m, 611 vw, 677 vw, 764 m ( $\rho_s$  SiCH<sub>3</sub>), 851 s ( $\rho_{as}$  SiCH<sub>3</sub>), 1025 vs ( $\nu$  Si–O–P), 1258 s ( $\delta_s$  SiCH<sub>3</sub>), 1413 w ( $\delta_{as}$  CH<sub>3</sub>), 1665 w ( $\delta$  OH), 2900 vw ( $\nu_s$  CH<sub>3</sub>), 2965 w ( $\nu_{as}$  CH<sub>3</sub>).

<sup>13</sup>C CPMAS NMR (**SiC2SiPH1**, ppm)  $\delta$  : 0.6 (SiCH<sub>2</sub>CH<sub>2</sub>Si + POSiCH<sub>3</sub>).

<sup>29</sup>Si CPMAS NMR (**SiC2SiPH1**, ppm)  $\delta$  : 26.5 (POSiMe<sub>3</sub>), –67 (CSiO<sub>3</sub>).

<sup>31</sup>P MAS NMR (**SiC2SiPH1**, ppm)  $\delta$  : –22 (O=P(OH)(OSi)<sub>2</sub>), –9 (O=P(OH)<sub>2</sub>(OSi)).

TG/DSC (air, 5 K  $\text{min}^{-1}$ ): weight loss at 1000 °C: 28.1 %.

BET: 42 m<sup>2</sup> g<sup>-1</sup>.

**Modification with hexamethyldisiloxane.** Characterization and analyses of **SiC2SiPHMDSO** xerogel.

IR (**SiC2SiPHMDSO**, KBr,  $\text{cm}^{-1}$ )  $\nu$  : 190 m, 607 vw, 644 vw, 762 m ( $\rho_s$  SiCH<sub>3</sub>), 850 s ( $\rho_{as}$  SiCH<sub>3</sub>), 1032 vs ( $\nu$  Si–O–P), 1175 vw, 1258 s ( $\delta_s$  SiCH<sub>3</sub>), 1408 w ( $\delta_{as}$  CH<sub>3</sub>), 2906 vw ( $\nu_s$  CH<sub>3</sub>), 2962 w ( $\nu_{as}$  CH<sub>3</sub>).

<sup>29</sup>Si CPMAS NMR (**SiC2SiPHMDSO**, ppm)  $\delta$  : 24.0 (POSiMe<sub>3</sub>), 14.2 (SiOSiMe<sub>3</sub>) –66 (CSiO<sub>3</sub>).

<sup>31</sup>P MAS NMR (**SiC2SiPHMDSO**, ppm)  $\delta$  : –30 (O=P(OSi)<sub>3</sub>).

TG/DSC (air, 5 K  $\text{min}^{-1}$ ): weight loss at 1000 °C: 35.3 %.

BET: 338 m<sup>2</sup> g<sup>-1</sup>.

**Modification with benzyltrichlorosilane.** Characterization and analyses of **SiPPhCH2Si** xerogel.

IR (**SiPPhCH2Si**, KBr,  $\text{cm}^{-1}$ )  $\nu$  : 501 s, 650 w, 698 w, 762 m ( $\rho_s$  SiCH<sub>3</sub>), 852 s ( $\rho_{as}$  SiCH<sub>3</sub>), 1035 vs ( $\nu$  Si–O–P), 1124 vs ( $\nu$  P–O–Si), 1258 s ( $\delta_s$  SiCH<sub>3</sub>), 1373 w ( $\delta_s$  CH<sub>3</sub>), 1424 w ( $\delta_{as}$  CH<sub>3</sub>), 1541 w ( $\nu_{as}$  COO bident), 1719 w ( $\nu_{as}$  COO unident), 1765 w ( $\nu_{as}$  COO unident), 2907 vw ( $\nu_s$  CH<sub>3</sub>), 2963 w ( $\nu_{as}$  CH<sub>3</sub>), 3032 vw ( $\nu_s$  CH ar.), 3061 vw ( $\nu_{as}$  CH ar.).

$^{13}\text{C}$  CPMAS NMR (**SiPPhCH<sub>2</sub>Si**, ppm)  $\delta$  : -4.5 (POSiCH<sub>3</sub>), 12.8 (CH<sub>3</sub>COO bident), 17.3 (CH<sub>3</sub>COO unident + C<sub>6</sub>H<sub>5</sub>CH<sub>2</sub>Si), 124.5 (C<sub>6</sub>H<sub>5</sub>CH<sub>2</sub>Si), 163.3 (CH<sub>3</sub>COO unident), 188.0 (CH<sub>3</sub>COO bident).

$^{29}\text{Si}$  CPMAS NMR (**SiPPhCH<sub>2</sub>Si**, ppm)  $\delta$  : 27.0 (POSiMe<sub>3</sub>), -41.5 (C<sub>6</sub>H<sub>5</sub>CH<sub>2</sub>Si(Cl)O<sub>2</sub>), -66 (C<sub>6</sub>H<sub>5</sub>CH<sub>2</sub>SiO<sub>3</sub>), -113 (SiO<sub>4</sub>), -196 (SiO<sub>6</sub>), -214 (SiO<sub>6</sub>).

$^{31}\text{P}$  MAS NMR (**SiPPhCH<sub>2</sub>Si**, ppm)  $\delta$  : -49 (P(OSi)<sub>4</sub>).

TG/DSC (air, 5 K min<sup>-1</sup>): weight loss at 1000 °C: 32.6 %.

BET: 385 m<sup>2</sup> g<sup>-1</sup>.

## Results

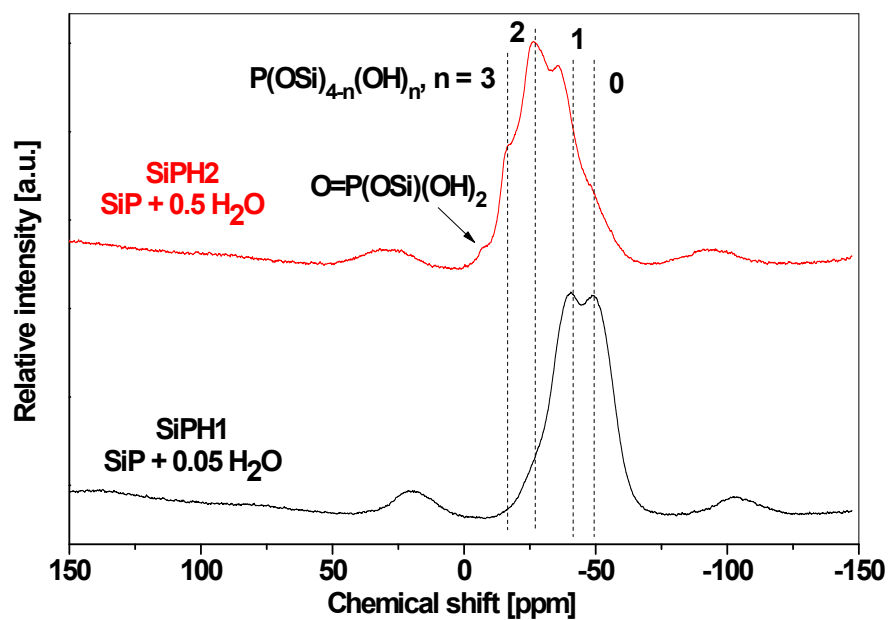

Fig. 1S: Comparison of  $^{31}\text{P}$  MAS NMR spectra of SiPH1 and SiPH2 samples.

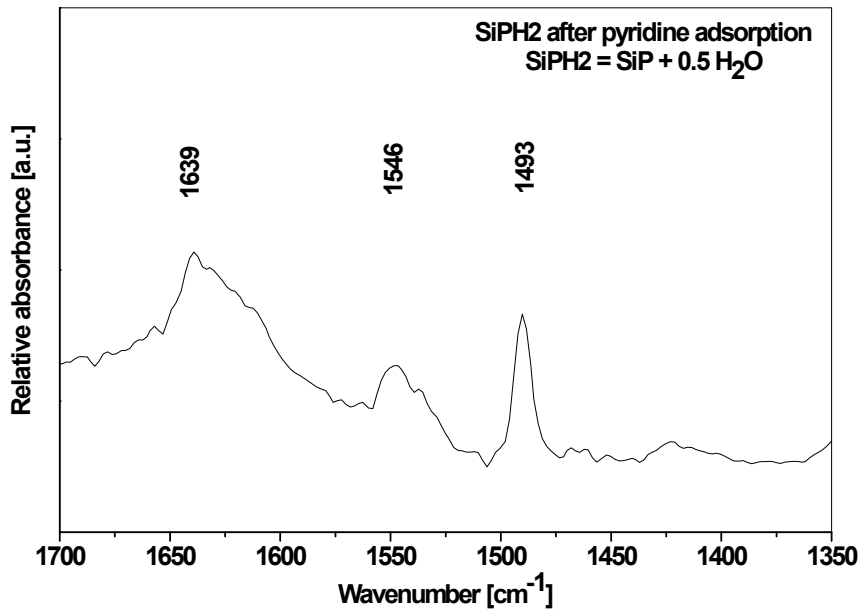

Fig. 2S: IR spectrum of SiPH2 xerogel after pyridine adsorption.

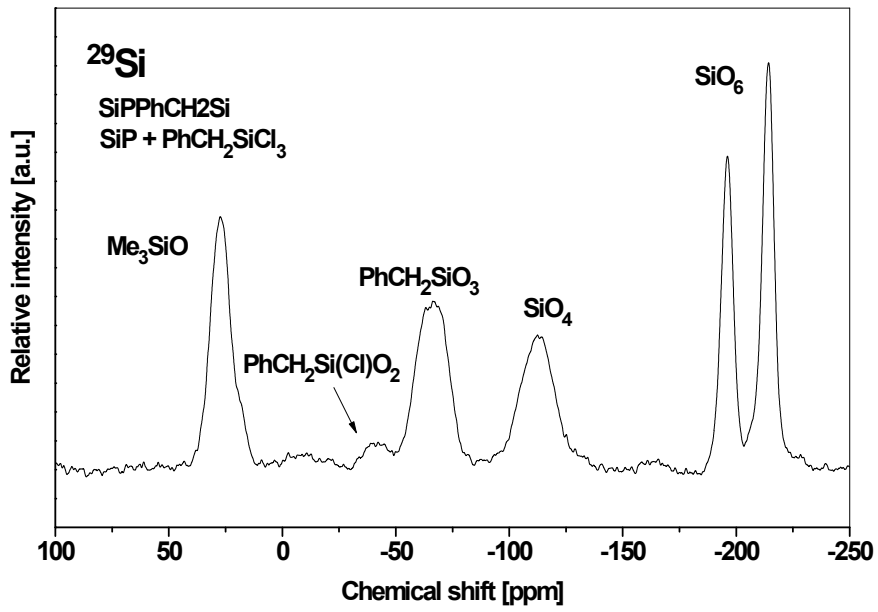

Fig. 3S:  $^{29}\text{Si}$  CPMAS NMR spectrum of SiPPhCH<sub>2</sub>Si xerogel.

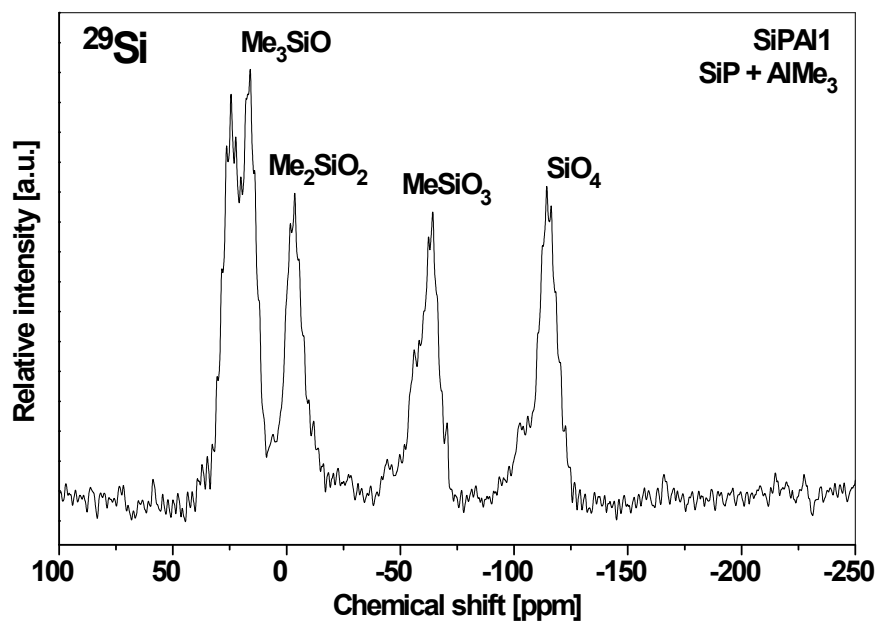

Fig. 4S:  $^{29}\text{Si}$  CPMAS NMR spectrum of SiPAI1 xerogel.

## References

- (1) Styskalik, A.; Skoda, D.; Moravec, Z.; Abbott, J. G.; Barnes, C. E.; Pinkas, J. *Microporous Mesoporous Mater.* **2014**, *197*, 204–212.
- (2) Styskalik, A.; Skoda, D.; Moravec, Z.; Babiak, M.; Barnes, C. E.; Pinkas, J. *J. Mater. Chem. A* **2015**, *3* (14), 7477–7487.
